# Supplementary material for: Characterization of Errors in Satellite-based HCHO / NO 2 Tropospheric Column Ratios with Respect to Chemistry, Column to PBL Translation, Spatial Representation, and Retrieval Uncertainties
Source: Copernicus journal article supplement (doi:10.5194/acp-2022-410), 2022-08-15
Supplement: Supplementary file 1 [file acp-2022-410-supplement.pdf]

1  
2

Supplementary materials:

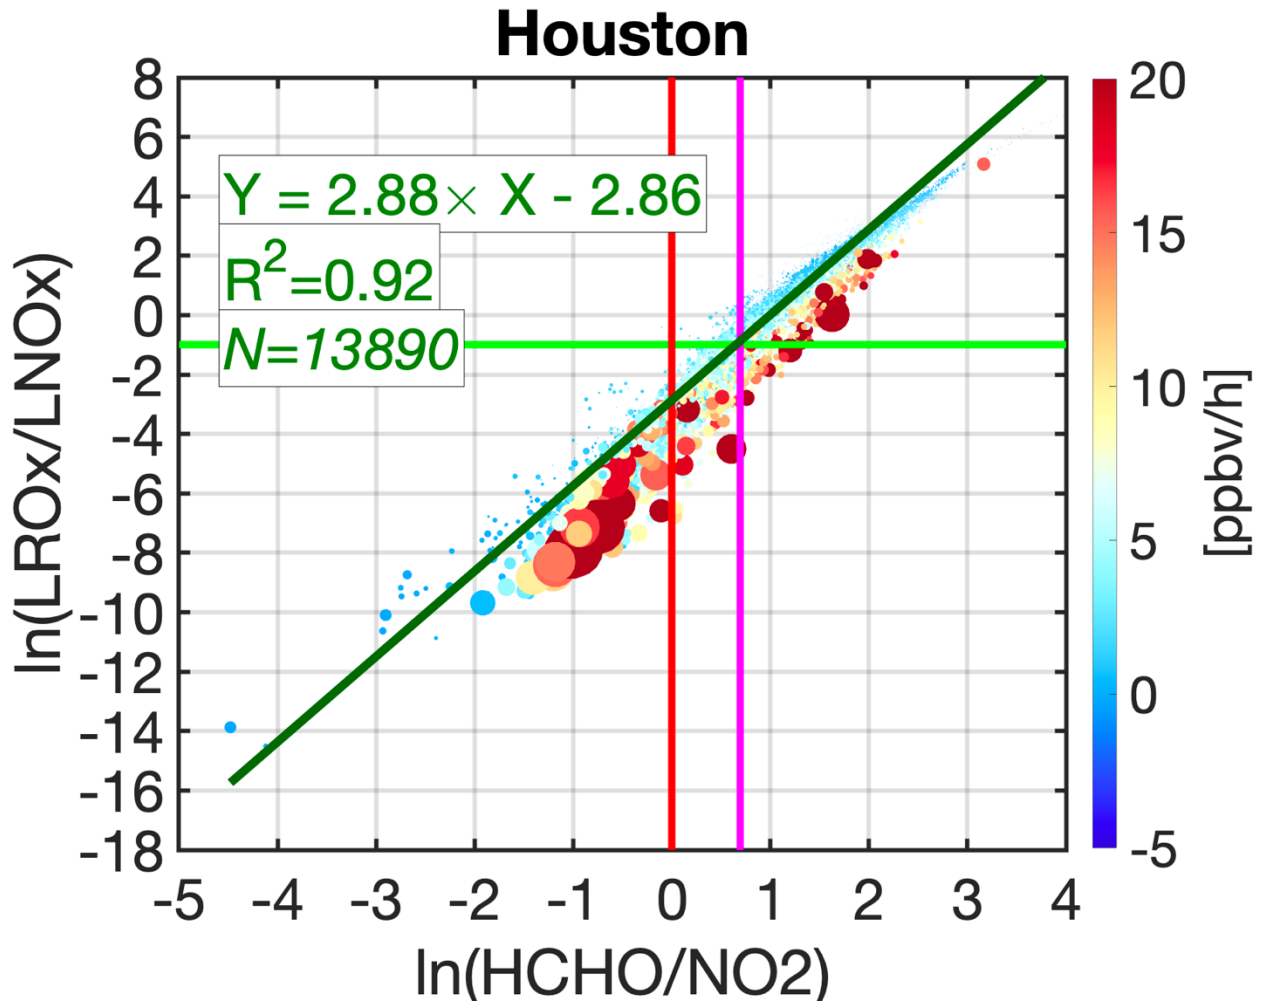

3  
4  
5  
6  
7  
8  
9  
10  
11  
12

**Figure S1.** The scatterplot of natural logarithm-transformed of HCHO/NO<sub>2</sub> versus LROx/LNOx based on the simulated values performed by the F0AM box model during DISCOVER-AQ Texas 2013. The heat color indicates the calculated ozone production rates (PO<sub>3</sub>). The size of each data point is proportional to HCHO×NO<sub>2</sub>. The light green line is the baseline separator of NO<sub>x</sub>-sensitive (above the line) and VOC-sensitive (below the line) regimes. We overlay HCHO/NO<sub>2</sub>=1 and HCHO/NO<sub>2</sub>=2 as red and purple lines, respectively. The dark green line indicates the least-squares fit to the paired data.

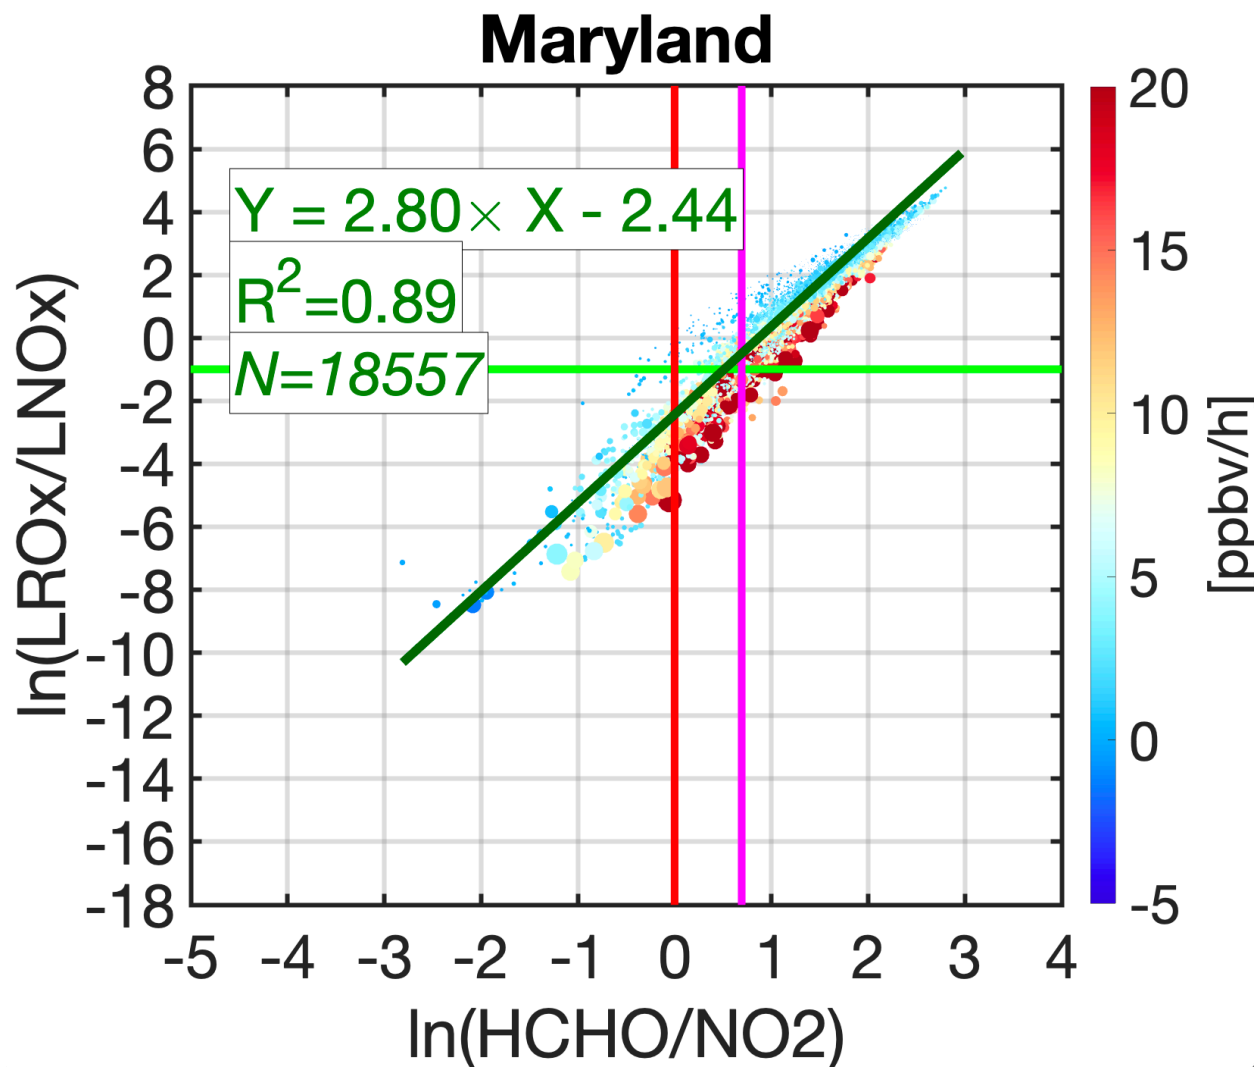

13  
14  
15

**Figure S2.** Same as Figure S1 but for DISCOVER Maryland 2011.

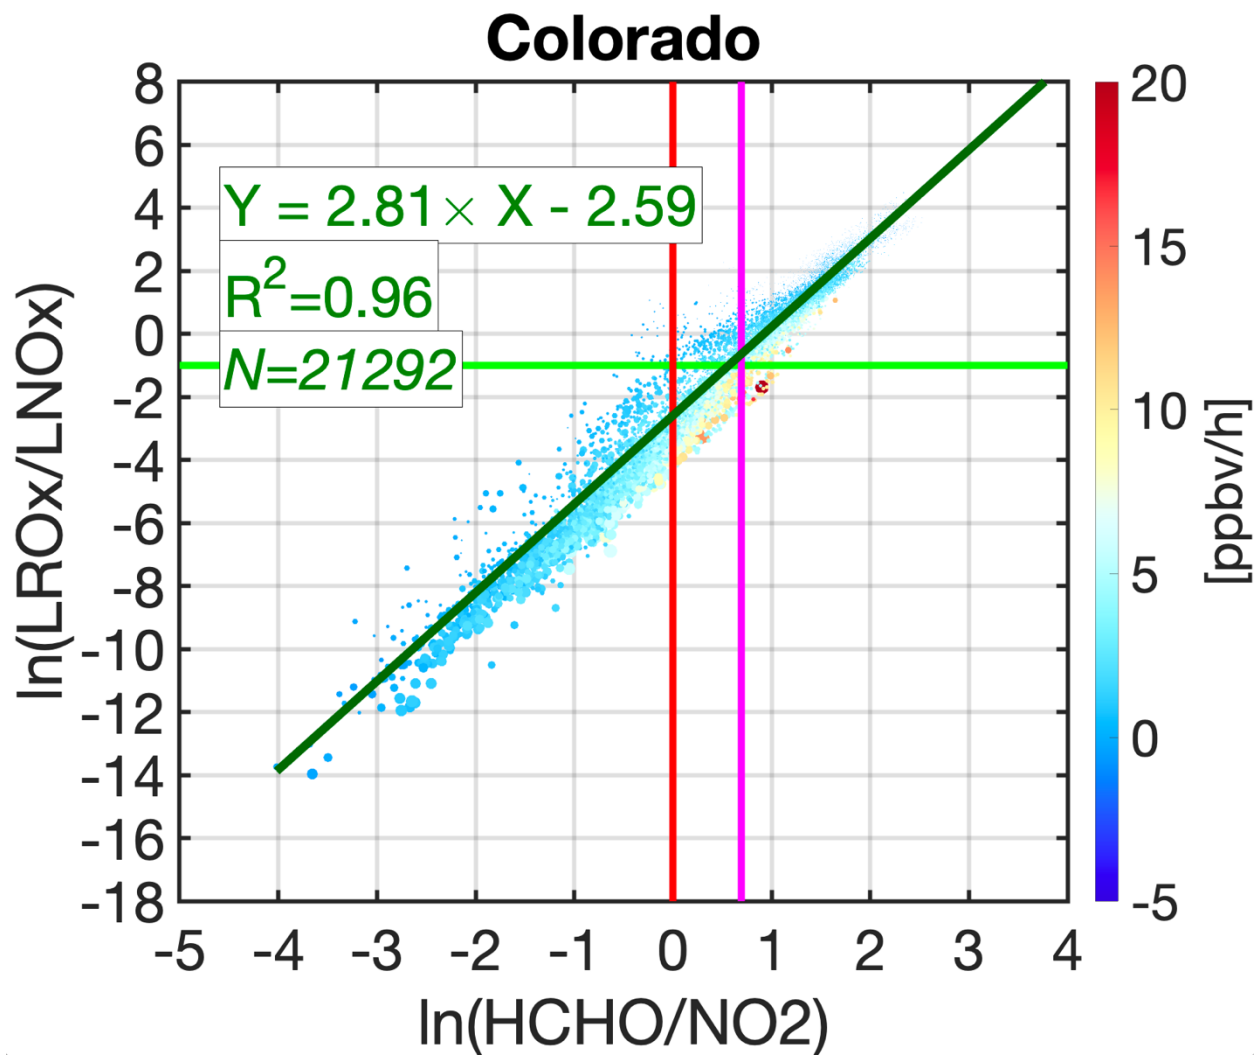

16  
 17 **Figure S3.** Same as Figure S1 but for DISCOVER Colorado 2014.  
 18

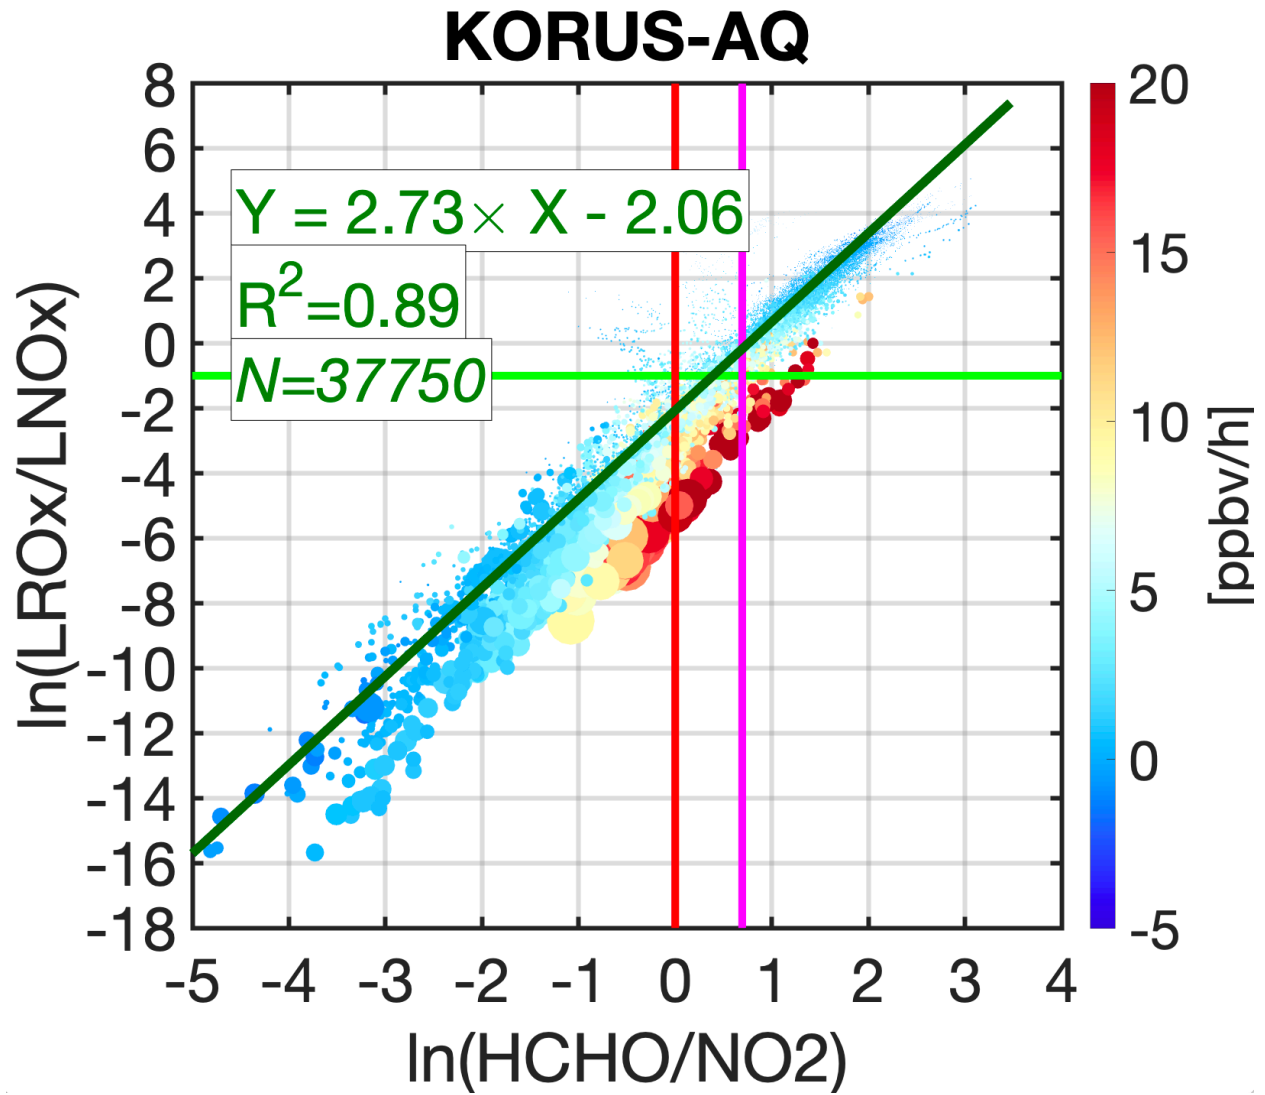

19  
20  
21

**Figure S4.** Same as Figure S1 but for KORUS-AQ 2016.

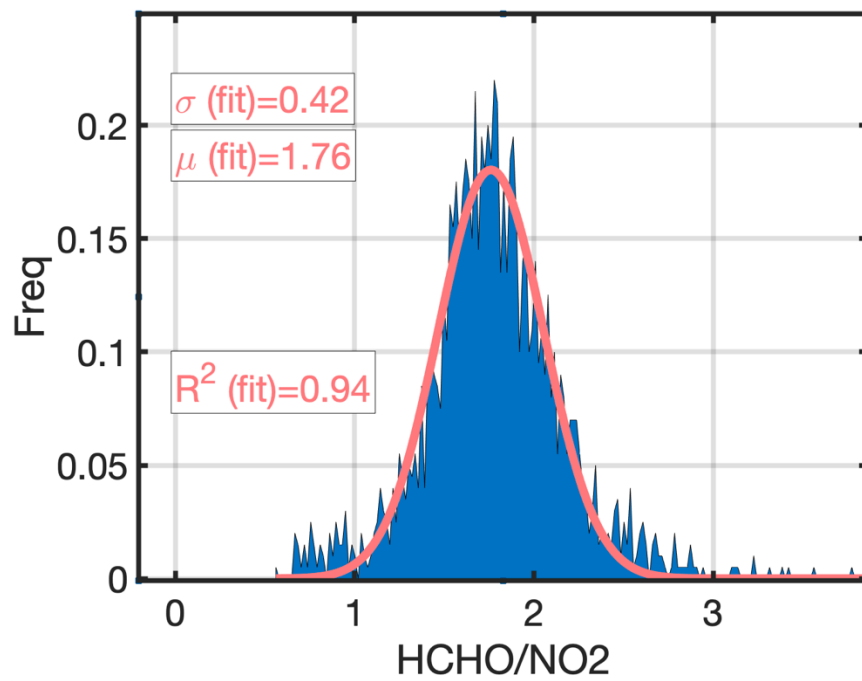

22  
23 **Figure S5.** The histogram of transitioning ratios based on simulated values of  $\ln(\text{LROx/LNOx}) =$   
24  $-1.0 \pm 0.2$ .  
25

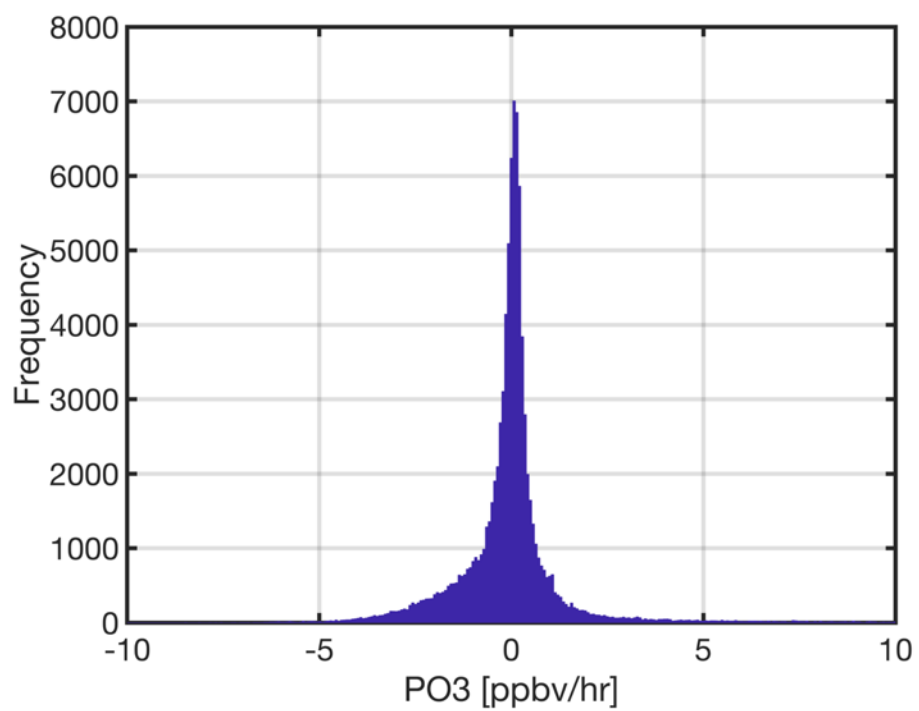

26  
27  
28

**Figure S6.** The residuals for the fit described in Eq4 in the main text.

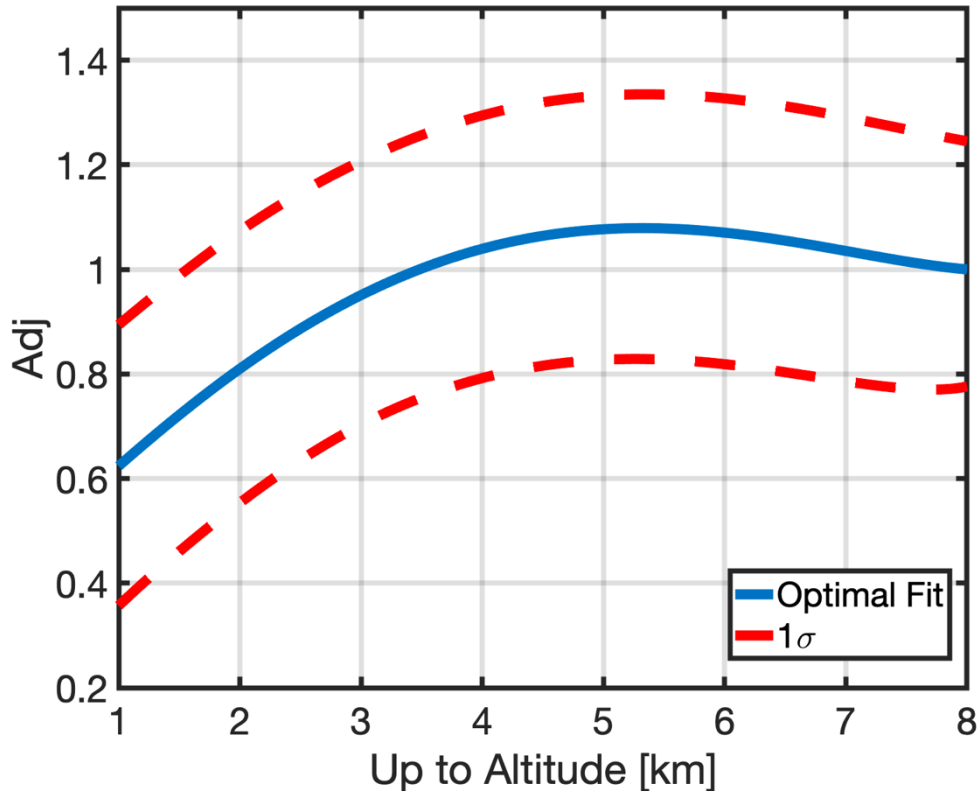

30  
31  
32  
33  
34  
35  
36

**Figure S7.** The adjustment factor defined as the ratio of the centroid (first moment) of the polygon bounding 1<sup>st</sup> and 75<sup>th</sup> percentiles of the observed HCHO/NO<sub>2</sub> columns by the NASA's aircraft between the surface to 8 km to the ones between the surface and a desired altitude. This factor can be easily applied to the observed HCHO/NO<sub>2</sub> columns to translate the value to a desired altitude stretching down to the surface (i.e., PBLH).

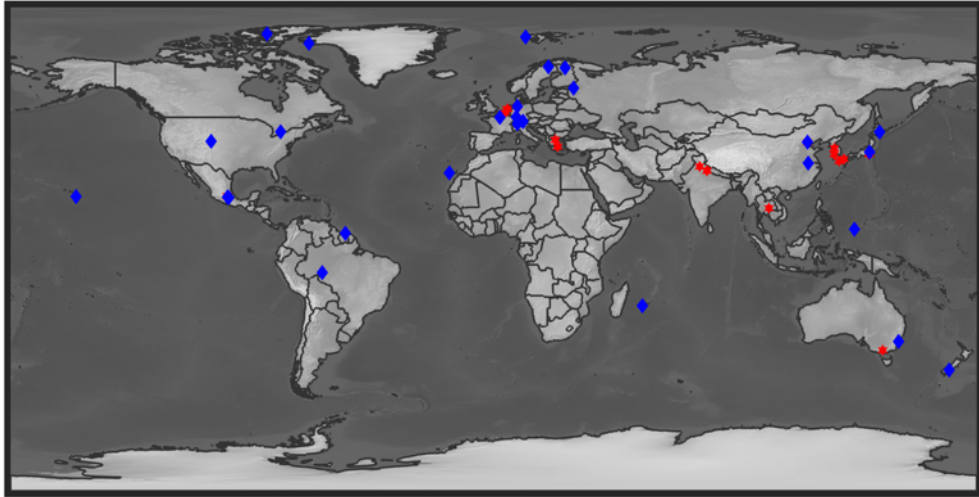

37  
38  
39

**Figure S8.** The location map of MAX-DOAS (red) and FTIR (blue) stations.



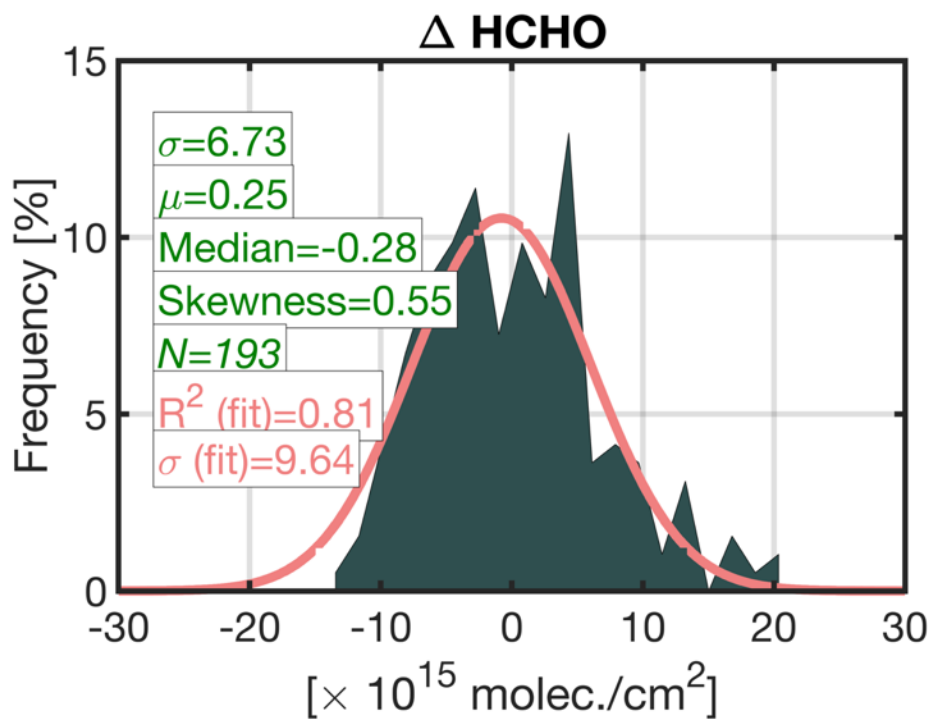

40  
 41 **Figure S9.** The histogram of the differences between OMI and corrected GEOS-Chem  
 42 simulations on monthly basis. The statistics in green color are based on all data, whereas those in  
 43 pink are based on the fitted Gaussian function.  
 44

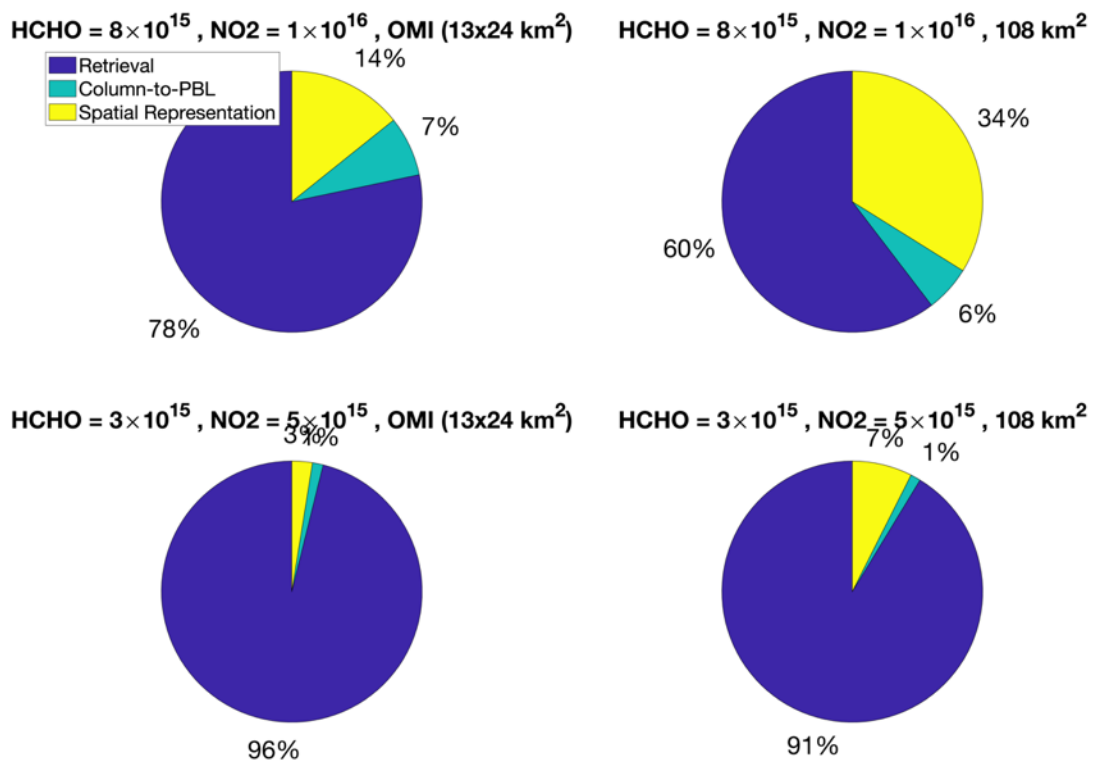

45  
 46 **Figure S10.** The fractional errors of retrieval (blue), column to PBL translation (green), and spatial  
 47 representation (yellow) of the total error budget for different concentrations and footprints based  
 48 on OMI sigma values. HCHO OMI sigma is from monthly comparison (Figure S9).  
 49
